# Supplementary material for: Genetic Differentiation and Migration Fluxes of Viruses from Melon Crops and Crop Edge Weeds
Source: PubMed Central journal article supplement (PMC9400485; doi:10.1128/jvi.00421-22), 2022-08-04
Supplement: jvi.00421-22-s0001.pdf [file jvi.00421-22-s0001.pdf]

## SUPPLEMENTARY TABLES AND FIGURES

**TABLE S1.** Summary of sequencing and reads' processing.

|                      | <b>Melon</b> | <b><i>S. nigrum</i></b> | <b><i>M. sylvestris</i></b> | <b><i>E. elaterium</i> (year 2020)</b> | <b><i>E. elaterium</i> (year 2021)</b> |
|----------------------|--------------|-------------------------|-----------------------------|----------------------------------------|----------------------------------------|
| <b>Raw reads</b>     | 95,674,756   | 96,683,858              | 96,873,136                  | 94,242,046                             | 105,494,586                            |
| <b>Clean reads</b>   | 92,331,320   | 93,638,414              | 93,264,932                  | 90,636,792                             | 95,330,384                             |
| <b>Host mappings</b> | 47,884,140   | -                       | -                           | -                                      | -                                      |
| <b>Filter reads</b>  | 44,447,180   | -                       | -                           | -                                      | -                                      |
| <b>Contigs</b>       | 31,876       | 68,239                  | 64,738                      | 47,717                                 | 16,106                                 |

**TABLE S2** Primers and probes used for viral detection by qRT-PCR.

| <b>Virus</b>   | <b>Target gene</b> | <b>Amplicon size</b> | <b>Primer/Probe</b> | <b>Sequence</b>                               |
|----------------|--------------------|----------------------|---------------------|-----------------------------------------------|
| <b>MNSV</b>    | RdRp               | 101 bp               | Forward             | 5'-CTCGCTGGGTTCTGTACTTC-3'                    |
|                |                    |                      | Reverse             | 5'-CCTAAACAATACAGTTTGC GTGT-3'                |
|                |                    |                      | Probe               | 5'-FAM-CCCAGACAT/ZEN/GACCGAGTTTCTCA-BHQ1-3'   |
| <b>CMV</b>     | CP                 | 161 bp               | Forward             | 5'-GAAGCTTGTTTTCGCGCATTTC-3'                  |
|                |                    |                      | Reverse             | 5'-ACTGATAAACCAGTACCGGTG-3'                   |
|                |                    |                      | Probe               | 5'-FAM-TGCCGAAATTTGATTCTACCGTGTGG-BHQ1-3'     |
| <b>TMGMV</b>   | CP                 | 106 bp               | Forward             | GTAGCTATAAGGGCTTCAATCA                        |
|                |                    |                      | Reverse             | TGGTCCARACAAGTCCACTA                          |
|                |                    |                      | Probe               | 5'-FAM-TGAACTGGTTCGTGGAAGTGGCAT-BHQ 3'        |
| <b>CCYV</b>    | RdRp               | 91 bp                | Forward             | 5'-GGTTTACACACCCGGTGAGTTT-3'                  |
|                |                    |                      | Reverse             | 5'-TGAAATTAGGGCTTGCTTCCA-3'                   |
|                |                    |                      | Probe               | 5'-HEX-TCTACTCGGAAAAGGTGAAAGAGCTCGACC-BHQ1-3' |
| <b>ToLCNDV</b> | CP                 | 144 bp               | Forward             | 5'-CCAACCGGAACCCCTCAAGATT-3'                  |
|                |                    |                      | Reverse             | 5'-TGCATACGTTTCTCCCGTCA-3'                    |
|                |                    |                      | Probe               | 5'-HEX- TAGCACAGCCACGGTGAAGAACAT-BHQ-1-3'     |
| <b>CmEV</b>    | RdRp               | 129 bp               | Forward             | 5'-TGGGAGTTCATCAAACGTAATA-3'                  |
|                |                    |                      | Reverse             | 5'-CCAGTCAACCGCATACTTC-3'                     |
|                |                    |                      | Probe               | 5'-TGGAAAGAAATGCATGAGGTGTGGAGA-3'             |
| <b>WMV</b>     | CP                 | 102 bp               | Forward             | 5'-ATTTCTCAGACGCAGCAGAA-3'                    |
|                |                    |                      | Reverse             | 5'-CTAATTCCTGTCTCTCAAATTTCT-3'                |
|                |                    |                      | Probe               | 5'-FAM-TGAGAACTCTGAAAGTCCGTATATGCCT-IB® FQ-3' |
| <b>CABYV</b>   | CP                 | 58 bp                | Forward             | 5'-GACGKTGGACCGCTAARCA-3'                     |
|                |                    |                      | Reverse             | 5'-TGGTCTTCGGTTGCATCRTG-3'                    |
|                |                    |                      | Probe               | 5'-FAM-ATCAACGGGATGGAATG-IB® FQ-3'            |

**TABLE S3** Contigs of the virus species recovered from this studies with their % of nucleotide identity with the hit.

| Contig ID  | Length (nt) | Host <sup>a</sup> | Viral species                                   | Fragments | % of nt <sup>b</sup> | Accession number <sup>c</sup>                                                                       |
|------------|-------------|-------------------|-------------------------------------------------|-----------|----------------------|-----------------------------------------------------------------------------------------------------|
| k141_14574 | 5158        | M                 | <i>Cucumis melo alphaendornavirus</i>           | -         | 92.40 %              | <a href="https://www.ncbi.nlm.nih.gov/nuclot/gi 1181747088 KX641269.1">gi 1181747088 KX641269.1</a> |
| k141_29085 | 8551        |                   | <i>Cucurbit chlorotic yellows virus</i>         | RNA 1     | 99.88 %              | <a href="https://www.ncbi.nlm.nih.gov/nuclot/gi 399142386 JN641883.1">gi 399142386 JN641883.1</a>   |
| k141_18754 | 8002        |                   |                                                 | RNA 2     | 99.83 %              | <a href="https://www.ncbi.nlm.nih.gov/nuclot/gi 289526328 AB523789.1">gi 289526328 AB523789.1</a>   |
| k141_14435 | 6154        |                   | <i>Watermelon mosaic virus</i>                  | -         | 98.25 %              | <a href="https://www.ncbi.nlm.nih.gov/nuclot/gi 326468188 JF273461.1">gi 326468188 JF273461.1</a>   |
| k141_29706 | 3364        |                   | <i>Cucurbit aphid-borne yellows virus</i>       | -         | 99.15 %              | <a href="https://www.ncbi.nlm.nih.gov/nuclot/gi 2095906809 MW051363.1">gi 2095906809 MW051363.1</a> |
| k141_21575 | 1321        |                   | <i>Cucumber mosaic virus</i>                    | RNA 3     | 98.46 %              | <a href="https://www.ncbi.nlm.nih.gov/nuclot/gi 25809284 AJ517802.1">gi 25809284 AJ517802.1</a>     |
| k141_109   | 4199        |                   | <i>Melon necrotic spot virus</i>                | -         | 97.14 %              | <a href="https://www.ncbi.nlm.nih.gov/nuclot/gi 1695685772 MK604924.1">gi 1695685772 MK604924.1</a> |
| k141_10185 | 1948        |                   | <i>Tomato leaf curl new delhi virus</i>         | DNA A     | 99.85 %              | <a href="https://www.ncbi.nlm.nih.gov/nuclot/gi 1976373550 LC596380.1">gi 1976373550 LC596380.1</a> |
| k141_46034 | 643         |                   | <i>Tobacco mild green mosaic virus</i>          | -         | 99.22 %              | <a href="https://www.ncbi.nlm.nih.gov/nuclot/gi 1485815685 MH730970.1">gi 1485815685 MH730970.1</a> |
| k141_3324  | 2651        | EE                | <i>Cucurbit aphid-borne yellows virus</i>       | -         | 97.39 %              | <a href="https://www.ncbi.nlm.nih.gov/nuclot/gi 388325696 JF939814.1">gi 388325696 JF939814.1</a>   |
| k141_10185 | 1948        |                   | <i>Tomato leaf curl new delhi virus</i>         | DNA A     | 99.85 %              | <a href="https://www.ncbi.nlm.nih.gov/nuclot/gi 1976373550 LC596380.1">gi 1976373550 LC596380.1</a> |
| k141_47606 | 2405        |                   |                                                 | DNA B     | 99.67 %              | <a href="https://www.ncbi.nlm.nih.gov/nuclot/gi 1590128862 MH577635.1">gi 1590128862 MH577635.1</a> |
| k141_46034 | 643         |                   | <i>Tobacco mild green mosaic virus</i>          | -         | 99.22 %              | <a href="https://www.ncbi.nlm.nih.gov/nuclot/gi 1485815685 MH730970.1">gi 1485815685 MH730970.1</a> |
| k141_10942 | 2629        |                   | <i>Turnip yellows virus</i>                     | -         | 77.09 %              | <a href="https://www.ncbi.nlm.nih.gov/nuclot/gi 428272515 JQ862472.1">gi 428272515 JQ862472.1</a>   |
| k141_13206 | 9061        |                   | <i>Cucurbit yellow stunting disorder virus</i>  | RNA 1     | 99.77 %              | <a href="https://www.ncbi.nlm.nih.gov/nuclot/gi 146432248 EF547827.1">gi 146432248 EF547827.1</a>   |
| k141_1043  | 5043        |                   |                                                 | RNA 2     | 99.84 %              | <a href="https://www.ncbi.nlm.nih.gov/nuclot/gi 30691654 AY242078.1">gi 30691654 AY242078.1</a>     |
| k141_52574 | 3786        | SN                | <i>Tomato yellow mottle associated virus</i>    | -         | 67.21 %              | <a href="https://www.ncbi.nlm.nih.gov/nuclot/gi 2208169437 OM827247.1">gi 2208169437 OM827247.1</a> |
| k141_31540 | 7536        |                   | <i>Potato virus Y</i>                           | -         | 92.44 %              | <a href="https://www.ncbi.nlm.nih.gov/nuclot/gi 1881044940 MT200665.1">gi 1881044940 MT200665.1</a> |
| k141_63224 | 767         |                   | <i>Moroccan pepper virus</i>                    | -         | 96.35 %              | <a href="https://www.ncbi.nlm.nih.gov/nuclot/gi 392932145 JX197071.1">gi 392932145 JX197071.1</a>   |
| k141_61722 | 559         |                   | <i>Tomato yellow leaf curl Sardinia virus</i>   | -         | 99.82 %              | <a href="https://www.ncbi.nlm.nih.gov/nuclot/gi 531439372 KC953604.1">gi 531439372 KC953604.1</a>   |
| k141_24792 | 2082        | MS                | <i>Tomato yellow mottle associated virus</i>    | -         | 65.03 %              | <a href="https://www.ncbi.nlm.nih.gov/nuclot/gi 1158622146 KY075646.1">gi 1158622146 KY075646.1</a> |
| k141_3496  | 13122       |                   | <i>Eggplant mottled dwarf nucleorhabdovirus</i> | -         | 90.21 %              | <a href="https://www.ncbi.nlm.nih.gov/nuclot/gi 594201519 KC905081.1">gi 594201519 KC905081.1</a>   |
| k141_3857  | 2579        |                   | <i>Potato virus Y</i>                           | -         | 93.52 %              | <a href="https://www.ncbi.nlm.nih.gov/nuclot/gi 1881044940 MT200665.1">gi 1881044940 MT200665.1</a> |
| k141_49773 | 1500        |                   | <i>Malva vein clearing virus</i>                | -         | 89.22 %              | <a href="https://www.ncbi.nlm.nih.gov/nuclot/gi 1808995387 MN116683.1">gi 1808995387 MN116683.1</a> |
| k141_9830  | 1072        |                   | <i>Malva vein clearing virus</i>                | -         | 83.44 %              | <a href="https://www.ncbi.nlm.nih.gov/nuclot/gi 1808995387 MN116683.1">gi 1808995387 MN116683.1</a> |
| k141_37018 | 6933        |                   | <i>Malva vein clearing virus</i>                | -         | 87.64 %              | <a href="https://www.ncbi.nlm.nih.gov/nuclot/gi 1808995387 MN116683.1">gi 1808995387 MN116683.1</a> |
| k141_66058 | 2708        |                   | <i>Chickpea chlorotic dwarf virus</i>           | -         | 85.57 %              | <a href="https://www.ncbi.nlm.nih.gov/nuclot/gi 725826289 KM229817.1">gi 725826289 KM229817.1</a>   |

<sup>a</sup>M; Melon, EE: *Ecballium elaterium*, SN: *Solanum nigrum*, MS: *Malva sylvestris*.

<sup>b</sup>Percentage of identity at nucleotide level of the contig with the viral species.

<sup>c</sup>The accession of the virus isolate that showed higher identity with the contig via website blastn.

**TABLE S4** Description of the melon and weed samples' and collection sites.

| Site ID                  | Localization | Sampling date | Species (Variety)    | Sample ID | Pool ID | Symptoms                  |
|--------------------------|--------------|---------------|----------------------|-----------|---------|---------------------------|
| <b>First year survey</b> |              |               |                      |           |         |                           |
| Site 1                   | Cartagena    | 17.06.2020    | Melon (Charentais)   | 7         | 7Pool   | yellowing                 |
|                          |              | 17.06.2020    |                      | 8         |         | mosaic                    |
|                          |              | 17.06.2020    |                      | 9         |         | yellowing                 |
|                          |              | 24.06.2020    |                      | 54        | 54Pool  | yellowing                 |
|                          |              | 24.06.2020    |                      | 55        |         | yellowing                 |
|                          |              | 24.06.2020    |                      | 56        |         | Mosaic                    |
|                          |              | 24.06.2020    |                      | 57        |         | yellowing                 |
|                          |              | 24.06.2020    |                      | 58        |         | yellowing                 |
|                          |              | 24.06.2020    |                      | 59        |         | yellowing                 |
|                          |              | 24.06.2020    |                      | 60        |         | yellowing                 |
|                          |              | 17.06.2020    | <i>E. elaterium</i>  | 10        | 10Pool  | Asymptomatic              |
|                          |              | 17.06.2020    |                      | 11        |         | Chlorosis in older leaves |
|                          |              | 17.06.2020    |                      | 12        |         | Chlorosis in older leaves |
|                          |              | 17.06.2020    |                      | 13        |         | Chlorosis in older leaves |
|                          |              | 17.06.2020    |                      | 14        |         | Chlorosis in older leaves |
|                          |              | 17.06.2020    |                      | 15        |         | Chlorosis in older leaves |
|                          |              | 17.06.2020    |                      | 16        |         | Chlorosis in older leaves |
|                          |              | 17.06.2020    | <i>S. nigrum</i>     | 17        | 17Pool  | Mosaic                    |
|                          |              | 17.06.2020    |                      | 18        |         | Mosaic                    |
|                          |              | 17.06.2020    |                      | 19        |         | Asymptomatic              |
|                          |              | 17.06.2020    |                      | 20        |         | chlorotic spots           |
|                          |              | 17.06.2020    |                      | 21        |         | Asymptomatic              |
|                          |              | 17.06.2020    |                      | 22        |         | Asymptomatic              |
|                          |              | 17.06.2020    |                      | 23        |         | Mosaic in young leaves    |
|                          |              | 17.06.2020    | <i>M. sylvestris</i> | 24        | 24Pool  | Asymptomatic              |
|                          |              | 17.06.2020    |                      | 25        |         | Asymptomatic              |
|                          |              | 17.06.2020    |                      | 26        |         | Leaf distortion           |
|                          |              | 17.06.2020    |                      | 27        |         | Asymptomatic              |
|                          |              | 17.06.2020    |                      | 28        |         | Asymptomatic              |
|                          |              | 17.06.2020    |                      | 29        |         | Yellowing                 |
| 17.06.2020               | 30           | Asymptomatic  |                      |           |         |                           |
| Site 2                   | Cartagena    | 17.06.2020    | Melon (Charentais)   | 32        | 32Pool  | Chlorotic spots           |
|                          |              | 07.07.2020    |                      | 101       | 101Pool | mosaic                    |
|                          |              | 07.07.2020    |                      | 102       |         | mosaic                    |
|                          |              | 07.07.2020    |                      | 103       |         | mosaic                    |
|                          |              | 07.07.2020    |                      | 104       |         | mosaic                    |
|                          |              | 07.07.2020    |                      | 105       |         | nascent mosaic            |
|                          |              | 07.07.2020    |                      | 106       |         | yellowing                 |
|                          |              | 07.07.2020    |                      | 107       |         | yellowing                 |
|                          |              | 07.07.2020    |                      | 108       |         | yellowing                 |
|                          |              | 07.07.2020    |                      | 109       |         | yellowing                 |
|                          |              | 07.07.2020    |                      | 110       |         | New delhi symptoms        |
|                          |              | 17.06.2020    | <i>E. elaterium</i>  | 33        | 33Pool  | Yellowing                 |
|                          |              | 17.06.2020    |                      | 34        |         | Yellowing                 |
| 17.06.2020               | 35           | Yellowing     |                      |           |         |                           |

|               |                      |                   |                      |                 |         |                               |
|---------------|----------------------|-------------------|----------------------|-----------------|---------|-------------------------------|
|               |                      | 17.06.2020        |                      | 36              |         | Yellowing                     |
|               |                      | 17.06.2020        |                      | 37              |         | Yellowing                     |
|               |                      | 17.06.2020        |                      | 38              |         | Yellowing                     |
|               |                      | 17.06.2020        |                      | 39              |         | Asymptomatic                  |
|               |                      | 17.06.2020        | <i>S. nigrum</i>     | 40              | 40Pool  | Asymptomatic                  |
|               |                      | 17.06.2020        |                      | 41              |         | Asymptomatic                  |
|               |                      | 17.06.2020        |                      | 42              |         | Mosaic                        |
|               |                      | 17.06.2020        |                      | 43              |         | Chlorotic spots (insect)      |
|               |                      | 17.06.2020        |                      | 44              |         | Mosaic                        |
|               |                      | 17.06.2020        |                      | 45              |         | Asymptomatic                  |
|               |                      | 17.06.2020        |                      | 46              |         | Asymptomatic                  |
|               |                      | 17.06.2020        | <i>M. sylvestris</i> | 47              | 47Pool  | chlorotic spots (mites)       |
|               |                      | 17.06.2020        |                      | 48              |         | chlorotic spots (mites)       |
|               |                      | 17.06.2020        |                      | 49              |         | Asymptomatic                  |
|               |                      | 17.06.2020        |                      | 50              |         | Asymptomatic                  |
|               |                      | 17.06.2020        |                      | 51              |         | Asymptomatic                  |
|               |                      | 17.06.2020        |                      | 52              |         | Asymptomatic                  |
|               |                      | 17.06.2020        |                      | 53              |         | Asymptomatic                  |
| <b>Site 3</b> | <b>Torre-Pacheco</b> | 24.06.2020        | Melon (Piel de Sapo) | 61              | 61Pool  | mosaic                        |
|               |                      | 24.06.2020        |                      | 62              |         | mosaic                        |
|               |                      | 14.07.2020        |                      | 143             | 143Pool | New delhi symptoms            |
|               |                      | 14.07.2020        |                      | 144             |         | mosaic                        |
|               |                      | 14.07.2020        |                      | 145             |         | mosaic                        |
|               |                      | 14.07.2020        |                      | 146             |         | mosaic                        |
|               |                      | 14.07.2020        |                      | 147             |         | mosaic                        |
|               |                      | 14.07.2020        |                      | 148             |         | yellowing                     |
|               |                      | 14.07.2020        |                      | 149             |         | yellowing                     |
|               |                      | 14.07.2020        |                      | 150             |         |                               |
|               |                      | 14.07.2020        |                      | 151             |         | yellowing                     |
|               |                      | 14.07.2020        |                      | 152             |         | yellowing                     |
|               |                      | 24.06.2020        | <i>E. elaterium</i>  | 63              | 63Pool  | Yellowing                     |
|               |                      | 24.06.2020        |                      | 64              |         | leaf malformation + yellowing |
|               |                      | 24.06.2020        |                      | 65              |         | leaf malformation + yellowing |
|               |                      | 24.06.2020        |                      | 66              |         | leaf malformation             |
|               |                      | 24.06.2020        |                      | 67              |         | leaf malformation             |
|               |                      | 24.06.2020        |                      | 68              |         | Asymptomatic                  |
|               |                      | 24.06.2020        |                      | 69              |         | Asymptomatic                  |
|               |                      | 24.06.2020        | <i>S. nigrum</i>     | 70              | 70Pool  | Nascent chlorosis             |
|               |                      | 24.06.2020        |                      | 71              |         | Asymptomatic                  |
| 24.06.2020    | 72                   | Asymptomatic      |                      |                 |         |                               |
| 24.06.2020    | 73                   | Nascent chlorosis |                      |                 |         |                               |
| 24.06.2020    | 74                   | Asymptomatic      |                      |                 |         |                               |
| 24.06.2020    | 75                   | Asymptomatic      |                      |                 |         |                               |
| 24.06.2020    |                      | 76                |                      | chlorotic spots |         |                               |
| 24.06.2020    | <i>M. sylvestris</i> | 77                | 77Pool               | Asymptomatic    |         |                               |
| 24.06.2020    |                      | 78                |                      | Yellowing       |         |                               |
| 24.06.2020    |                      | 79                |                      | Yellowing       |         |                               |
| 24.06.2020    |                      | 80                |                      | Yellowing       |         |                               |
| 24.06.2020    |                      | 81                |                      | Yellowing       |         |                               |

|               |                  |                     |                      |                    |                    |                                              |
|---------------|------------------|---------------------|----------------------|--------------------|--------------------|----------------------------------------------|
| <b>Site 4</b> | <b>Lo Jurado</b> | 24.06.2020          | Melon (Piel de Sapo) | 82                 | 82Pool             | mosaic                                       |
|               |                  | 24.06.2020          |                      | 83                 |                    | mosaic                                       |
|               |                  | 24.06.2020          |                      | 84                 |                    | leaf curling,internods shortening, yellowing |
|               |                  | 24.06.2020          |                      | 85                 |                    | leaf curling,internods shortening, yellowing |
|               |                  | 24.06.2020          |                      | 86                 |                    | leaf curling,internods shortening, yellowing |
|               |                  | 24.06.2020          |                      | 87                 |                    | yellowing + mosaic                           |
|               |                  | 07.07.2020          |                      | 111                |                    | mosaic                                       |
|               |                  | 07.07.2020          | 112                  | mosaic             |                    |                                              |
|               |                  | 07.07.2020          | 113                  | mosaic             |                    |                                              |
|               |                  | 07.07.2020          | 114                  | yellowing          |                    |                                              |
|               |                  | 07.07.2020          | 115                  | yellowing          |                    |                                              |
|               |                  | 07.07.2020          | 116                  | yellowing          |                    |                                              |
|               |                  | 07.07.2020          | 117                  | New delhi symptoms |                    |                                              |
|               |                  | 07.07.2020          | 118                  | New delhi symptoms |                    |                                              |
|               |                  | 07.07.2020          | 119                  | New delhi symptoms |                    |                                              |
|               |                  | 24.06.2020          | <i>E. elaterium</i>  | 88Pool             | 88                 | Yellowing (insects)                          |
|               |                  | 24.06.2020          |                      |                    | 89                 | Yellowing (insects)                          |
|               |                  | 24.06.2020          |                      |                    | 90                 | Yellowing (insects)                          |
|               |                  | 24.06.2020          |                      |                    | 91                 | Yellowing (insects)                          |
|               |                  | 24.06.2020          |                      |                    | 92                 | Asymptomatic                                 |
|               |                  | 24.06.2020          |                      |                    | 93                 | Yellowing (insects)                          |
|               |                  | 24.06.2020          |                      |                    | 94                 | Asymptomatic                                 |
|               |                  | 24.06.2020          |                      | 95                 | Asymptomatic       |                                              |
|               |                  | 07.07.2020          |                      | 120Pool            | 120                | Asymptomatic                                 |
|               |                  | 07.07.2020          |                      |                    | 121                | Asymptomatic                                 |
|               |                  | 07.07.2020          |                      |                    | 122                | Asymptomatic                                 |
|               |                  | 07.07.2020          |                      |                    | 123                | Asymptomatic                                 |
| 07.07.2020    | 124              | Asymptomatic        |                      |                    |                    |                                              |
| 07.07.2020    | 125              | Asymptomatic        |                      |                    |                    |                                              |
| 07.07.2020    | 126              | Asymptomatic        |                      |                    |                    |                                              |
| 07.07.2020    | 127              | Chlorotic spots     |                      |                    |                    |                                              |
| <b>Site 5</b> | <b>Aguillas</b>  | Melon (Amarillo)    |                      | 153Pool            | 153                | mosaic                                       |
|               |                  |                     | 154                  |                    | mosaic             |                                              |
|               |                  |                     | 155                  |                    | mosaic             |                                              |
|               |                  |                     | 156                  |                    | mosaic             |                                              |
|               |                  |                     | 157                  |                    | mosaic             |                                              |
|               |                  |                     | 158                  |                    | yellowing          |                                              |
|               |                  |                     | 159                  |                    | yellowing          |                                              |
|               |                  |                     | 160                  |                    | yellowing          |                                              |
|               |                  |                     | 161                  |                    | yellowing          |                                              |
|               |                  |                     | 162                  |                    | yellowing          |                                              |
|               |                  |                     | 163                  |                    | yellowing          |                                              |
|               |                  |                     | 164                  |                    | New delhi symptoms |                                              |
| <b>Site 6</b> | <b>Santomera</b> | <i>E. elaterium</i> | 172Pool              | 172                | Asymptomatic       |                                              |
|               |                  |                     |                      | 173                | Yellowing          |                                              |
|               |                  |                     |                      | 174                | Asymptomatic       |                                              |
|               |                  |                     |                      | 175                | Asymptomatic       |                                              |
|               |                  |                     |                      | 176                | Asymptomatic       |                                              |
|               |                  |                     |                      | 177                | Asymptomatic       |                                              |

|            |               |                                        |                      |                     |                                                  |                         |
|------------|---------------|----------------------------------------|----------------------|---------------------|--------------------------------------------------|-------------------------|
|            |               | 16.07.2020                             |                      | 178                 |                                                  | Asymptomatic            |
|            |               | 16.07.2020                             |                      | 179                 |                                                  | Asymptomatic            |
|            |               | 16.07.2020                             |                      | 180                 |                                                  | Yellowing               |
|            |               | 16.07.2020                             |                      | 181                 |                                                  | Chlorotic spots         |
|            |               | 16.07.2020                             | <i>S. nigrum</i>     | 182                 | 182Pool                                          | Mosaic                  |
|            |               | 16.07.2020                             |                      | 183                 |                                                  | Mosaic                  |
|            |               | 16.07.2020                             |                      | 184                 |                                                  | Asymptomatic            |
|            |               | 16.07.2020                             |                      | 185                 |                                                  | Asymptomatic            |
|            |               | 16.07.2020                             |                      | 186                 |                                                  | Asymptomatic            |
|            |               | 16.07.2020                             |                      | 187                 |                                                  | Asymptomatic            |
|            |               | 16.07.2020                             |                      | 188                 |                                                  | Asymptomatic            |
|            |               | 16.07.2020                             |                      | 189                 |                                                  | Asymptomatic            |
|            |               | 16.07.2020                             |                      | 190                 |                                                  | Asymptomatic            |
|            |               | 16.07.2020                             |                      | 191                 |                                                  | Asymptomatic            |
|            |               | 16.07.2020                             | <i>M. sylvestris</i> | 192                 | 192Pool                                          | Yellowing               |
|            |               | 16.07.2020                             |                      | 193                 |                                                  | Asymptomatic            |
|            |               | 16.07.2020                             |                      | 194                 |                                                  | Asymptomatic            |
|            |               | 16.07.2020                             |                      | 195                 |                                                  | Asymptomatic            |
|            |               | 16.07.2020                             |                      | 196                 |                                                  | Asymptomatic            |
|            |               | 16.07.2020                             |                      | 197                 |                                                  | Asymptomatic            |
|            |               | 16.07.2020                             |                      | 198                 |                                                  | Yellowing               |
|            |               | 16.07.2020                             |                      | 199                 |                                                  | Asymptomatic            |
|            |               | 16.07.2020                             |                      | 200                 |                                                  | fungi symptoms          |
|            |               | 16.07.2020                             |                      | 201                 |                                                  | Asymptomatic            |
| Site 7     | Villamanrique | 22.07.2020                             | Melon (Piel de Sapo) | 202                 | 202Pool                                          | Mosaic (severity 4.5/5) |
|            |               | 22.07.2020                             |                      | 203                 |                                                  | Mosaic (severity 3.5/5) |
|            |               | 22.07.2020                             |                      | 204                 |                                                  | Mosaic (severity 2.5/5) |
|            |               | 22.07.2020                             |                      | 205                 |                                                  | Mosaic (severity 2/5)   |
|            |               | 22.07.2020                             |                      | 206                 |                                                  | Mosaic (severity 2/5)   |
|            |               | 22.07.2020                             |                      | 207                 |                                                  | Mosaic (severity 2/5)   |
|            |               | 22.07.2020                             |                      | 208                 |                                                  | Mosaic (severity 1.5/5) |
|            |               | 22.07.2020                             |                      | 209                 |                                                  | Yellowing               |
|            |               | 22.07.2020                             |                      | 210                 |                                                  | Yellowing               |
|            |               | 22.07.2020                             |                      | 211                 |                                                  | Yellowing               |
|            |               | 22.05.2020                             |                      | <i>E. elaterium</i> |                                                  | 1                       |
|            |               | 22.05.2020                             | 2                    |                     | Vein clearing and malformation in the new leaves |                         |
|            |               | 22.05.2020                             | 3                    |                     | Vein clearing in younger leaves                  |                         |
|            |               | 22.05.2020                             | 4                    |                     | vein clearing and malformation of young leaves   |                         |
|            |               | 22.05.2020                             | 5                    |                     | Malformation of young leaves                     |                         |
|            |               | 22.05.2020                             | 6                    |                     | chlorotic spots and malformation of new leaves   |                         |
|            |               | 22.07.2020                             |                      | 212                 | 212Pool                                          | Yellowing               |
|            |               | 22.07.2020                             |                      | 213                 |                                                  | Asymptomatic            |
|            |               | 22.07.2020                             | <i>S. nigrum</i>     | 214                 | 214Pool                                          | Asymptomatic            |
|            |               | 22.07.2020                             |                      | 215                 |                                                  | Asymptomatic            |
| 22.07.2020 | 216           | Asymptomatic                           |                      |                     |                                                  |                         |
| 22.07.2020 | 217           | Asymptomatic                           |                      |                     |                                                  |                         |
| 22.07.2020 | 218           | Small chlorotic spots (mites probably) |                      |                     |                                                  |                         |
| 22.07.2020 | 219           | Asymptomatic                           |                      |                     |                                                  |                         |
| 22.07.2020 |               | 220                                    |                      | Asymptomatic        |                                                  |                         |

|        |              |            |                      |                     |              |                       |         |                               |
|--------|--------------|------------|----------------------|---------------------|--------------|-----------------------|---------|-------------------------------|
| Site 8 | Villaconejos | 22.07.2020 | Melon (Piel de Sapo) | 221                 | 221Pool      | Yellowing             |         |                               |
|        |              | 22.07.2020 |                      | 222                 |              | Yellowing             |         |                               |
|        |              | 22.07.2020 |                      | 223                 |              | Mosaic (severity 5/5) |         |                               |
|        |              | 22.07.2020 |                      | 224                 |              | Mosaic (severity 5/5) |         |                               |
|        |              | 22.07.2020 |                      | 225                 |              | Mosaic (severity 5/5) |         |                               |
|        |              | 22.07.2020 |                      | 226                 |              | Mosaic (severity 5/5) |         |                               |
|        |              | 22.07.2020 |                      | 227                 |              | Mosaic (severity 5/5) |         |                               |
|        |              | 22.07.2020 |                      | 228                 |              | Mosaic (severity 4/5) |         |                               |
|        |              | 22.07.2020 |                      | 229                 |              | Mosaic (severity 3/5) |         |                               |
|        |              | 22.07.2020 |                      | 230                 |              | Mosaic (severity 2/5) |         |                               |
|        |              | 22.07.2020 |                      | 231                 |              | Mosaic (severity 2/5) |         |                               |
|        |              | 22.07.2020 |                      | 232                 |              | Mosaic (severity 2/5) |         |                               |
|        |              | 22.07.2020 |                      | <i>E. elaterium</i> |              | 233                   | 233Pool | Yellowing + leaf malformation |
|        |              | 22.07.2020 |                      |                     |              | 234                   |         | Asymptomatic                  |
|        |              | 22.07.2020 | 235                  |                     | Asymptomatic |                       |         |                               |
|        |              | 22.07.2020 | 236                  |                     | Asymptomatic |                       |         |                               |
|        |              | 22.07.2020 | 237                  |                     | Asymptomatic |                       |         |                               |
|        |              | 22.07.2020 | 238                  |                     | Asymptomatic |                       |         |                               |
|        |              | 22.07.2020 | 239                  |                     | Asymptomatic |                       |         |                               |
|        |              | 22.07.2020 | <i>M. sylvestris</i> | 240                 | 240Pool      | Yellowing             |         |                               |
|        |              | 22.07.2020 |                      | 241                 |              | Asymptomatic          |         |                               |
|        |              | 22.07.2020 |                      | 242                 |              | Asymptomatic          |         |                               |
|        |              | 22.07.2020 |                      | 243                 |              | Asymptomatic          |         |                               |
|        |              | 22.07.2020 |                      | 244                 |              | Asymptomatic          |         |                               |
|        |              | 22.07.2020 |                      | 245                 |              | Asymptomatic          |         |                               |
|        |              | 22.07.2020 |                      | 246                 |              | Yellowing             |         |                               |

**Second year survey**

|        |               |            |                     |     |         |              |
|--------|---------------|------------|---------------------|-----|---------|--------------|
| Site 3 | Torre-Pacheco | 26.07.2021 | <i>E. elaterium</i> | 255 | 255Pool | Asymptomatic |
|        |               |            |                     | 256 |         | Asymptomatic |
|        |               |            |                     | 257 |         | Asymptomatic |
|        |               |            |                     | 258 |         | Yellowing    |
|        |               |            |                     | 259 |         | Asymptomatic |
|        |               |            |                     | 260 |         | Asymptomatic |
|        |               |            |                     | 261 |         | Asymptomatic |
| Site 4 | Lo-Jurado     | 26.07.2021 | <i>E. elaterium</i> | 277 | 277Pool | Asymptomatic |
|        |               |            |                     | 278 |         | Asymptomatic |
|        |               |            |                     | 279 |         | Asymptomatic |
|        |               |            |                     | 280 |         | Asymptomatic |
|        |               |            |                     | 281 |         | Asymptomatic |
|        |               |            |                     | 282 |         | Asymptomatic |
|        |               |            |                     | 283 |         | Asymptomatic |
|        |               |            |                     | 284 |         | Yellowing    |
|        |               |            |                     | 285 |         | Asymptomatic |
|        |               |            |                     | 286 |         | Asymptomatic |
|        |               |            |                     | 287 |         | Asymptomatic |
|        |               |            |                     | 288 |         | Asymptomatic |
| 289    | Asymptomatic  |            |                     |     |         |              |
| 290    | Asymptomatic  |            |                     |     |         |              |
| 291    | Asymptomatic  |            |                     |     |         |              |



|               |                  |            |                     |     |         |             |
|---------------|------------------|------------|---------------------|-----|---------|-------------|
|               |                  |            |                     | 292 |         | Asymtomatic |
| <b>Site 6</b> | <b>Santomera</b> | 26.07.2021 | <i>E. elaterium</i> | 293 | 293Pool | Asymtomatic |
|               |                  |            |                     | 294 |         | Asymtomatic |
|               |                  |            |                     | 295 |         | Asymtomatic |
|               |                  |            |                     | 296 |         | Asymtomatic |
|               |                  |            |                     | 297 |         | Asymtomatic |
|               |                  |            |                     | 298 |         | Asymtomatic |
|               |                  |            |                     | 299 |         | Asymtomatic |
|               |                  |            |                     | 300 |         | Asymtomatic |
|               |                  |            |                     | 301 |         | Asymtomatic |
|               |                  |            |                     | 302 |         | Asymtomatic |

**TABLE S5** Detection of TMGMV in Melon samples at 8 and 15 days post-inoculation (dpi) by qRT-PCR.

| <b>Plant ID</b>           | <b>plant part</b> | <b>dpi</b> | <b>Ct value</b> |
|---------------------------|-------------------|------------|-----------------|
| <b>1</b>                  | Cotyledon         | 8          | 24.7            |
|                           | Second Leaf       | 15         | 33.9            |
| <b>2</b>                  | Cotyledon         | 8          | 28.7            |
|                           | Second Leaf       | 15         | -               |
| <b>3</b>                  | Cotyledon         | 8          | 28.0            |
|                           | Second Leaf       | 15         | -               |
| <b>4</b>                  | Cotyledon         | 8          | 25.5            |
|                           | Second Leaf       | 15         | -               |
| <b>5</b>                  | Cotyledon         | 8          | 23.5            |
|                           | Second Leaf       | 15         | -               |
| <b>6</b>                  | Cotyledon         | 8          | 25.0            |
|                           | Second Leaf       | 15         | -               |
| <b>7</b>                  | Cotyledon         | 8          | 23.4            |
|                           | Second Leaf       | 15         | 33.3            |
| <b>8</b>                  | Cotyledon         | 8          | 24.4            |
|                           | Second Leaf       | 15         | 30.3            |
| <b>Negative control 1</b> | Cotyledon         | 8          | -               |
|                           | Second Leaf       | 15         | -               |
| <b>Negative control 2</b> | Cotyledon         | 8          | -               |
|                           | Second Leaf       | 15         | -               |
| <b>Negative control 3</b> | Cotyledon         | 8          | -               |
|                           | Second Leaf       | 15         | -               |
| <b>Negative control 4</b> | Cotyledon         | 8          | -               |
|                           | Second Leaf       | 15         | -               |

**TABLE S6** Genetic diversity of Cucurbit aphid-borne yellows virus (CABYV) isolates in mean posterior non-synonymous ( $\beta$ ) and synonymous ( $\alpha$ ) positions at each codon of the open reading frame (ORF) 2 for CABYV isolates from melon.

| Site | $\alpha^a$ | $\beta^b$ | $B-\alpha^c$ | $\text{Prob}[\alpha > \beta]^d$ | $\text{Prob}[\alpha < \beta]^e$ | $\text{BayesFactor}[\alpha < \beta]^f$ |
|------|------------|-----------|--------------|---------------------------------|---------------------------------|----------------------------------------|
| 1    | 2.499      | 0.768     | -1.732       | 0.675                           | 0.266                           | 0.609                                  |
| 2    | 8.692      | 0.344     | -8.348       | 0.998                           | 0.001                           | 0.001                                  |
| 3    | 0.802      | 0.389     | -0.413       | 0.608                           | 0.330                           | 0.829                                  |
| 4    | 1.313      | 0.358     | -0.954       | 0.667                           | 0.277                           | 0.645                                  |
| 5    | 0.578      | 0.465     | -0.113       | 0.527                           | 0.408                           | 1.159                                  |
| 6    | 0.595      | 0.410     | -0.186       | 0.560                           | 0.375                           | 1.007                                  |
| 7    | 1.944      | 0.392     | -1.552       | 0.821                           | 0.142                           | 0.279                                  |
| 8    | 2.699      | 0.381     | -2.318       | 0.850                           | 0.119                           | 0.226                                  |
| 9    | 0.771      | 0.387     | -0.385       | 0.605                           | 0.333                           | 0.838                                  |
| 10   | 0.867      | 0.388     | -0.479       | 0.614                           | 0.325                           | 0.809                                  |
| 11   | 0.866      | 0.398     | -0.468       | 0.608                           | 0.331                           | 0.831                                  |
| 12   | 0.741      | 0.412     | -0.329       | 0.586                           | 0.351                           | 0.911                                  |
| 13   | 1.037      | 0.470     | -0.567       | 0.730                           | 0.220                           | 0.476                                  |
| 14   | 0.874      | 0.471     | -0.403       | 0.574                           | 0.366                           | 0.969                                  |
| 15   | 0.880      | 0.411     | -0.469       | 0.603                           | 0.337                           | 0.854                                  |
| 16   | 4.007      | 0.358     | -3.649       | 0.724                           | 0.229                           | 0.499                                  |
| 17   | 0.578      | 0.465     | -0.113       | 0.527                           | 0.408                           | 1.159                                  |
| 18   | 0.829      | 0.889     | 0.060        | 0.360                           | 0.580                           | 2.325                                  |
| 19   | 0.661      | 0.423     | -0.239       | 0.567                           | 0.369                           | 0.982                                  |
| 20   | 7.116      | 0.760     | -6.356       | 0.919                           | 0.055                           | 0.098                                  |
| 21   | 0.682      | 0.405     | -0.277       | 0.580                           | 0.356                           | 0.929                                  |
| 22   | 1.591      | 1.724     | 0.133        | 0.393                           | 0.517                           | 1.797                                  |
| 23   | 0.863      | 0.421     | -0.442       | 0.595                           | 0.344                           | 0.883                                  |
| 24   | 6.082      | 0.396     | -5.685       | 0.980                           | 0.012                           | 0.020                                  |
| 25   | 0.801      | 0.392     | -0.409       | 0.606                           | 0.332                           | 0.837                                  |
| 26   | 0.596      | 0.391     | -0.205       | 0.571                           | 0.363                           | 0.956                                  |
| 27   | 15.241     | 0.388     | -14.853      | 0.999                           | 0.001                           | 0.001                                  |
| 28   | 2.865      | 4.139     | 1.274        | 0.254                           | 0.616                           | 2.693                                  |
| 29   | 0.595      | 0.403     | -0.192       | 0.564                           | 0.370                           | 0.989                                  |
| 30   | 0.798      | 0.421     | -0.377       | 0.589                           | 0.350                           | 0.904                                  |
| 31   | 1.749      | 0.475     | -1.273       | 0.779                           | 0.178                           | 0.365                                  |
| 32   | 3.527      | 4.542     | 1.015        | 0.265                           | 0.595                           | 2.475                                  |
| 33   | 0.594      | 0.429     | -0.165       | 0.548                           | 0.386                           | 1.058                                  |
| 34   | 2.628      | 0.381     | -2.247       | 0.849                           | 0.120                           | 0.229                                  |
| 35   | 0.683      | 0.395     | -0.288       | 0.587                           | 0.349                           | 0.901                                  |
| 36   | 0.863      | 0.421     | -0.442       | 0.595                           | 0.344                           | 0.883                                  |
| 37   | 0.596      | 0.391     | -0.205       | 0.571                           | 0.363                           | 0.956                                  |
| 38   | 0.627      | 0.392     | -0.235       | 0.578                           | 0.357                           | 0.933                                  |
| 39   | 9.111      | 0.390     | -8.721       | 0.993                           | 0.004                           | 0.006                                  |
| 40   | 11.847     | 0.384     | -11.463      | 0.997                           | 0.002                           | 0.003                                  |
| 41   | 5.531      | 0.337     | -5.195       | 0.964                           | 0.026                           | 0.045                                  |

|    |        |       |         |       |       |       |
|----|--------|-------|---------|-------|-------|-------|
| 42 | 5.129  | 0.376 | -4.754  | 0.952 | 0.035 | 0.061 |
| 43 | 0.782  | 0.402 | -0.381  | 0.598 | 0.340 | 0.868 |
| 44 | 4.225  | 0.386 | -3.839  | 0.937 | 0.046 | 0.081 |
| 45 | 0.734  | 1.712 | 0.978   | 0.203 | 0.744 | 4.878 |
| 46 | 0.802  | 0.389 | -0.413  | 0.608 | 0.330 | 0.829 |
| 47 | 3.423  | 0.378 | -3.045  | 0.867 | 0.105 | 0.198 |
| 48 | 0.880  | 0.411 | -0.469  | 0.603 | 0.337 | 0.854 |
| 49 | 0.778  | 0.454 | -0.323  | 0.570 | 0.368 | 0.981 |
| 50 | 0.637  | 0.791 | 0.153   | 0.344 | 0.596 | 2.482 |
| 51 | 0.782  | 0.402 | -0.381  | 0.598 | 0.340 | 0.868 |
| 52 | 6.367  | 0.399 | -5.969  | 0.982 | 0.011 | 0.018 |
| 53 | 0.682  | 0.410 | -0.271  | 0.577 | 0.359 | 0.942 |
| 54 | 0.780  | 0.420 | -0.361  | 0.587 | 0.351 | 0.910 |
| 55 | 2.743  | 0.407 | -2.337  | 0.840 | 0.127 | 0.244 |
| 56 | 0.769  | 0.406 | -0.364  | 0.593 | 0.345 | 0.885 |
| 57 | 0.865  | 0.403 | -0.462  | 0.605 | 0.334 | 0.844 |
| 58 | 0.769  | 0.406 | -0.364  | 0.593 | 0.345 | 0.885 |
| 59 | 0.770  | 0.401 | -0.369  | 0.596 | 0.342 | 0.873 |
| 60 | 0.783  | 0.397 | -0.386  | 0.600 | 0.338 | 0.858 |
| 61 | 4.007  | 0.358 | -3.649  | 0.724 | 0.229 | 0.499 |
| 62 | 0.866  | 0.395 | -0.472  | 0.610 | 0.329 | 0.824 |
| 63 | 0.768  | 0.421 | -0.347  | 0.584 | 0.354 | 0.920 |
| 64 | 1.500  | 0.376 | -1.124  | 0.810 | 0.151 | 0.300 |
| 65 | 1.136  | 0.464 | -0.671  | 0.741 | 0.211 | 0.448 |
| 66 | 2.013  | 0.406 | -1.607  | 0.819 | 0.144 | 0.283 |
| 67 | 15.777 | 0.398 | -15.378 | 0.998 | 0.001 | 0.002 |
| 68 | 0.738  | 1.017 | 0.280   | 0.330 | 0.611 | 2.644 |
| 69 | 1.434  | 0.454 | -0.980  | 0.767 | 0.188 | 0.390 |
| 70 | 0.661  | 0.423 | -0.239  | 0.567 | 0.369 | 0.982 |
| 71 | 0.769  | 0.408 | -0.362  | 0.592 | 0.346 | 0.889 |
| 72 | 0.741  | 0.412 | -0.329  | 0.586 | 0.351 | 0.911 |
| 73 | 0.595  | 0.423 | -0.171  | 0.552 | 0.383 | 1.043 |
| 74 | 1.262  | 0.448 | -0.814  | 0.758 | 0.196 | 0.411 |
| 75 | 2.955  | 0.365 | -2.590  | 0.864 | 0.107 | 0.202 |
| 76 | 2.789  | 0.432 | -2.356  | 0.833 | 0.133 | 0.258 |
| 77 | 0.683  | 0.389 | -0.294  | 0.591 | 0.346 | 0.888 |
| 78 | 0.778  | 0.454 | -0.323  | 0.570 | 0.368 | 0.981 |
| 79 | 10.178 | 0.361 | -9.817  | 0.982 | 0.013 | 0.021 |
| 80 | 0.880  | 0.411 | -0.469  | 0.603 | 0.337 | 0.854 |
| 81 | 0.769  | 0.406 | -0.364  | 0.593 | 0.345 | 0.885 |
| 82 | 2.810  | 0.399 | -2.411  | 0.846 | 0.122 | 0.233 |
| 83 | 7.091  | 0.337 | -6.754  | 0.932 | 0.053 | 0.094 |
| 84 | 2.840  | 0.386 | -2.454  | 0.852 | 0.117 | 0.222 |
| 85 | 1.316  | 1.083 | -0.233  | 0.522 | 0.405 | 1.146 |
| 86 | 4.032  | 0.964 | -3.068  | 0.484 | 0.464 | 1.453 |
| 87 | 0.725  | 0.405 | -0.320  | 0.588 | 0.349 | 0.903 |
| 88 | 2.849  | 0.399 | -2.450  | 0.848 | 0.121 | 0.231 |

|     |        |       |         |       |       |       |
|-----|--------|-------|---------|-------|-------|-------|
| 89  | 0.595  | 0.423 | -0.171  | 0.552 | 0.383 | 1.043 |
| 90  | 0.771  | 0.389 | -0.382  | 0.603 | 0.334 | 0.844 |
| 91  | 0.772  | 0.385 | -0.386  | 0.606 | 0.331 | 0.834 |
| 92  | 0.782  | 0.402 | -0.381  | 0.598 | 0.340 | 0.868 |
| 93  | 0.771  | 0.389 | -0.382  | 0.603 | 0.334 | 0.844 |
| 94  | 11.063 | 0.386 | -10.677 | 0.999 | 0.000 | 0.001 |
| 95  | 2.131  | 0.365 | -1.766  | 0.841 | 0.125 | 0.241 |
| 96  | 0.767  | 0.427 | -0.340  | 0.581 | 0.357 | 0.934 |
| 97  | 4.005  | 0.421 | -3.585  | 0.923 | 0.056 | 0.100 |
| 98  | 11.257 | 0.346 | -10.911 | 0.998 | 0.001 | 0.002 |
| 99  | 0.802  | 0.387 | -0.416  | 0.609 | 0.329 | 0.824 |
| 100 | 10.808 | 0.371 | -10.437 | 0.996 | 0.002 | 0.004 |
| 101 | 0.878  | 0.431 | -0.446  | 0.592 | 0.348 | 0.896 |
| 102 | 0.778  | 0.454 | -0.323  | 0.570 | 0.368 | 0.981 |
| 103 | 11.352 | 0.381 | -10.971 | 0.997 | 0.002 | 0.003 |
| 104 | 2.898  | 0.386 | -2.513  | 0.854 | 0.115 | 0.219 |
| 105 | 0.878  | 0.431 | -0.446  | 0.592 | 0.348 | 0.896 |
| 106 | 8.952  | 0.346 | -8.605  | 0.982 | 0.013 | 0.022 |
| 107 | 3.257  | 1.058 | -2.198  | 0.397 | 0.548 | 2.035 |
| 108 | 0.874  | 0.471 | -0.403  | 0.574 | 0.366 | 0.969 |
| 109 | 4.475  | 0.351 | -4.125  | 0.949 | 0.037 | 0.065 |
| 110 | 0.770  | 0.401 | -0.369  | 0.596 | 0.342 | 0.873 |
| 111 | 2.729  | 0.365 | -2.364  | 0.858 | 0.112 | 0.213 |
| 112 | 10.441 | 0.363 | -10.078 | 0.996 | 0.002 | 0.004 |
| 113 | 7.126  | 0.407 | -6.719  | 0.966 | 0.024 | 0.041 |
| 114 | 0.575  | 1.785 | 1.210   | 0.170 | 0.783 | 6.056 |
| 115 | 0.798  | 0.427 | -0.371  | 0.585 | 0.353 | 0.917 |
| 116 | 1.034  | 0.471 | -0.563  | 0.730 | 0.221 | 0.476 |
| 117 | 0.802  | 0.387 | -0.416  | 0.609 | 0.329 | 0.824 |
| 118 | 0.596  | 0.391 | -0.205  | 0.571 | 0.363 | 0.956 |
| 119 | 0.801  | 0.392 | -0.409  | 0.606 | 0.332 | 0.837 |
| 120 | 2.321  | 3.931 | 1.609   | 0.232 | 0.654 | 3.180 |
| 121 | 0.578  | 0.465 | -0.113  | 0.527 | 0.408 | 1.159 |
| 122 | 5.088  | 0.349 | -4.738  | 0.956 | 0.032 | 0.055 |
| 123 | 0.771  | 0.387 | -0.385  | 0.605 | 0.333 | 0.838 |
| 124 | 0.878  | 0.431 | -0.446  | 0.592 | 0.348 | 0.896 |
| 125 | 4.042  | 0.440 | -3.602  | 0.685 | 0.268 | 0.615 |
| 126 | 0.629  | 0.495 | -0.134  | 0.530 | 0.407 | 1.152 |
| 127 | 0.731  | 0.791 | 0.060   | 0.363 | 0.577 | 2.297 |
| 128 | 13.783 | 0.369 | -13.414 | 0.998 | 0.001 | 0.002 |
| 129 | 3.701  | 0.682 | -3.019  | 0.530 | 0.418 | 1.209 |
| 130 | 1.313  | 0.358 | -0.954  | 0.667 | 0.277 | 0.645 |
| 131 | 0.662  | 0.409 | -0.253  | 0.575 | 0.361 | 0.949 |
| 132 | 0.596  | 0.389 | -0.207  | 0.573 | 0.361 | 0.950 |
| 133 | 0.863  | 0.421 | -0.442  | 0.595 | 0.344 | 0.883 |
| 134 | 0.866  | 0.399 | -0.467  | 0.607 | 0.332 | 0.834 |
| 135 | 7.042  | 0.340 | -6.702  | 0.974 | 0.019 | 0.032 |

|     |        |       |         |       |       |       |
|-----|--------|-------|---------|-------|-------|-------|
| 136 | 11.396 | 0.386 | -11.010 | 0.999 | 0.000 | 0.001 |
| 137 | 9.553  | 0.333 | -9.220  | 0.996 | 0.002 | 0.004 |
| 138 | 0.863  | 0.421 | -0.442  | 0.595 | 0.344 | 0.883 |
| 139 | 4.042  | 0.440 | -3.602  | 0.685 | 0.268 | 0.615 |
| 140 | 0.866  | 0.395 | -0.472  | 0.610 | 0.329 | 0.824 |
| 141 | 0.595  | 0.423 | -0.171  | 0.552 | 0.383 | 1.043 |
| 142 | 0.801  | 0.392 | -0.409  | 0.606 | 0.332 | 0.837 |
| 143 | 0.863  | 0.421 | -0.442  | 0.595 | 0.344 | 0.883 |
| 144 | 4.042  | 0.440 | -3.602  | 0.685 | 0.268 | 0.615 |
| 145 | 0.770  | 0.401 | -0.369  | 0.596 | 0.342 | 0.873 |
| 146 | 0.595  | 0.403 | -0.192  | 0.564 | 0.370 | 0.989 |
| 147 | 0.739  | 0.867 | 0.127   | 0.351 | 0.589 | 2.414 |
| 148 | 5.826  | 0.365 | -5.461  | 0.961 | 0.028 | 0.049 |
| 149 | 0.682  | 0.410 | -0.271  | 0.577 | 0.359 | 0.942 |
| 150 | 4.158  | 0.676 | -3.482  | 0.541 | 0.408 | 1.158 |
| 151 | 34.881 | 0.473 | -34.408 | 1.000 | 0.000 | 0.000 |
| 152 | 0.768  | 0.421 | -0.347  | 0.584 | 0.354 | 0.920 |
| 153 | 0.629  | 0.495 | -0.134  | 0.530 | 0.407 | 1.152 |
| 154 | 16.165 | 1.398 | -14.767 | 0.972 | 0.008 | 0.013 |
| 155 | 0.769  | 0.406 | -0.364  | 0.593 | 0.345 | 0.885 |
| 156 | 1.144  | 1.126 | -0.018  | 0.493 | 0.433 | 1.284 |
| 157 | 0.802  | 0.387 | -0.416  | 0.609 | 0.329 | 0.824 |
| 158 | 2.567  | 0.381 | -2.185  | 0.847 | 0.121 | 0.232 |
| 159 | 0.682  | 0.410 | -0.271  | 0.577 | 0.359 | 0.942 |
| 160 | 1.268  | 0.450 | -0.819  | 0.758 | 0.196 | 0.410 |
| 161 | 0.817  | 0.764 | -0.053  | 0.381 | 0.559 | 2.128 |
| 162 | 11.543 | 4.531 | -7.012  | 0.650 | 0.161 | 0.323 |
| 163 | 0.732  | 0.732 | -0.000  | 0.377 | 0.562 | 2.159 |
| 164 | 0.802  | 0.387 | -0.416  | 0.609 | 0.329 | 0.824 |
| 165 | 0.769  | 0.406 | -0.364  | 0.593 | 0.345 | 0.885 |
| 166 | 7.121  | 0.347 | -6.774  | 0.991 | 0.006 | 0.010 |
| 167 | 1.242  | 0.453 | -0.789  | 0.755 | 0.198 | 0.416 |
| 168 | 5.616  | 0.765 | -4.850  | 0.890 | 0.076 | 0.139 |
| 169 | 0.662  | 0.409 | -0.253  | 0.575 | 0.361 | 0.949 |
| 170 | 3.044  | 0.385 | -2.659  | 0.858 | 0.112 | 0.212 |
| 171 | 4.042  | 0.440 | -3.602  | 0.685 | 0.268 | 0.615 |
| 172 | 2.859  | 0.430 | -2.430  | 0.894 | 0.079 | 0.144 |
| 173 | 0.648  | 1.352 | 0.704   | 0.213 | 0.733 | 4.611 |
| 174 | 16.203 | 0.380 | -15.823 | 0.998 | 0.001 | 0.001 |
| 175 | 5.539  | 0.341 | -5.198  | 0.913 | 0.068 | 0.123 |
| 176 | 2.645  | 0.373 | -2.272  | 0.853 | 0.116 | 0.220 |
| 177 | 3.567  | 0.372 | -3.194  | 0.873 | 0.100 | 0.187 |
| 178 | 0.866  | 0.395 | -0.472  | 0.610 | 0.329 | 0.824 |
| 179 | 0.768  | 0.421 | -0.347  | 0.584 | 0.354 | 0.920 |
| 180 | 0.770  | 0.401 | -0.369  | 0.596 | 0.342 | 0.873 |
| 181 | 0.866  | 0.399 | -0.467  | 0.607 | 0.332 | 0.834 |
| 182 | 0.579  | 0.777 | 0.198   | 0.330 | 0.610 | 2.630 |

|     |        |       |         |       |       |       |
|-----|--------|-------|---------|-------|-------|-------|
| 183 | 7.896  | 0.334 | -7.561  | 0.994 | 0.004 | 0.006 |
| 184 | 3.436  | 0.395 | -3.040  | 0.861 | 0.110 | 0.207 |
| 185 | 0.661  | 0.438 | -0.223  | 0.559 | 0.377 | 1.017 |
| 186 | 1.974  | 0.373 | -1.602  | 0.832 | 0.133 | 0.257 |
| 187 | 1.274  | 0.450 | -0.824  | 0.758 | 0.196 | 0.409 |
| 188 | 3.170  | 0.425 | -2.745  | 0.904 | 0.071 | 0.129 |
| 189 | 0.800  | 0.407 | -0.392  | 0.596 | 0.342 | 0.873 |
| 190 | 0.874  | 0.471 | -0.403  | 0.574 | 0.366 | 0.969 |
| 191 | 0.725  | 0.405 | -0.320  | 0.588 | 0.349 | 0.903 |
| 192 | 0.768  | 0.421 | -0.347  | 0.584 | 0.354 | 0.920 |
| 193 | 2.095  | 0.374 | -1.722  | 0.836 | 0.130 | 0.250 |
| 194 | 0.767  | 0.427 | -0.340  | 0.581 | 0.357 | 0.934 |
| 195 | 4.337  | 0.391 | -3.946  | 0.888 | 0.088 | 0.162 |
| 196 | 3.506  | 0.446 | -3.060  | 0.847 | 0.122 | 0.233 |
| 197 | 3.445  | 0.387 | -3.058  | 0.866 | 0.106 | 0.199 |
| 198 | 0.683  | 0.387 | -0.297  | 0.592 | 0.344 | 0.880 |
| 199 | 0.767  | 0.427 | -0.340  | 0.581 | 0.357 | 0.934 |
| 200 | 0.866  | 0.395 | -0.472  | 0.610 | 0.329 | 0.824 |
| 201 | 17.601 | 0.391 | -17.210 | 0.998 | 0.001 | 0.001 |
| 202 | 0.683  | 0.389 | -0.294  | 0.591 | 0.346 | 0.888 |
| 203 | 0.802  | 0.387 | -0.416  | 0.609 | 0.329 | 0.824 |
| 204 | 0.638  | 0.751 | 0.113   | 0.353 | 0.586 | 2.384 |
| 205 | 0.801  | 0.392 | -0.409  | 0.606 | 0.332 | 0.837 |
| 206 | 2.934  | 0.802 | -2.132  | 0.687 | 0.255 | 0.576 |

<sup>a</sup>Mean posterior synonymous substitution rate at a site.

<sup>b</sup>Mean posterior non-synonymous substitution rate at a site.

<sup>c</sup>Mean posterior beta-alpha.

<sup>d</sup>Posterior probability of negative selection at a site.

<sup>e</sup>Posterior probability of positive selection at a site.

<sup>f</sup>Empirical Bayes Factor for positive selection at a site.

**TABLE S7** Genetic diversity of Cucurbit aphid-borne yellows virus (CABYV) isolates in mean posterior non-synonymous ( $\beta$ ) and synonymous ( $\alpha$ ) positions at each codon of the open reading frame (ORF) 2 for CABYV isolates from *E. elaterium*.

| Site | $\alpha$ | $\beta$ | B- $\alpha$ | Prob[ $\alpha > \beta$ ] | Prob[ $\alpha < \beta$ ] | BayesFactor[ $\alpha < \beta$ ] |
|------|----------|---------|-------------|--------------------------|--------------------------|---------------------------------|
| 1    | 0.648    | 0.332   | -0.316      | 0.619                    | 0.315                    | 0.860                           |
| 2    | 6.415    | 0.218   | -6.197      | 0.998                    | 0.001                    | 0.002                           |
| 3    | 0.694    | 0.315   | -0.379      | 0.640                    | 0.295                    | 0.782                           |
| 4    | 1.271    | 0.274   | -0.997      | 0.723                    | 0.222                    | 0.534                           |
| 5    | 0.491    | 0.408   | -0.083      | 0.523                    | 0.407                    | 1.285                           |
| 6    | 0.542    | 0.337   | -0.205      | 0.589                    | 0.341                    | 0.969                           |
| 7    | 0.542    | 0.336   | -0.206      | 0.590                    | 0.340                    | 0.965                           |
| 8    | 4.215    | 0.255   | -3.960      | 0.962                    | 0.028                    | 0.053                           |
| 9    | 1.804    | 0.285   | -1.519      | 0.868                    | 0.103                    | 0.215                           |
| 10   | 0.717    | 0.321   | -0.396      | 0.638                    | 0.297                    | 0.792                           |
| 11   | 0.717    | 0.321   | -0.396      | 0.638                    | 0.297                    | 0.791                           |
| 12   | 0.646    | 0.339   | -0.307      | 0.614                    | 0.320                    | 0.881                           |
| 13   | 0.440    | 0.407   | -0.033      | 0.496                    | 0.431                    | 1.418                           |
| 14   | 0.725    | 0.398   | -0.327      | 0.590                    | 0.347                    | 0.993                           |
| 15   | 0.738    | 0.334   | -0.404      | 0.632                    | 0.304                    | 0.818                           |
| 16   | 3.510    | 0.559   | -2.951      | 0.585                    | 0.365                    | 1.076                           |
| 17   | 0.491    | 0.408   | -0.083      | 0.523                    | 0.407                    | 1.285                           |
| 18   | 0.577    | 6.090   | 5.513       | 0.007                    | 0.980                    | 93.727                          |
| 19   | 1.412    | 0.333   | -1.079      | 0.825                    | 0.139                    | 0.302                           |
| 20   | 0.638    | 0.328   | -0.309      | 0.620                    | 0.314                    | 0.854                           |
| 21   | 0.607    | 0.336   | -0.271      | 0.608                    | 0.325                    | 0.900                           |
| 22   | 0.594    | 3.686   | 3.091       | 0.062                    | 0.909                    | 18.610                          |
| 23   | 0.641    | 0.682   | 0.041       | 0.377                    | 0.563                    | 2.406                           |
| 24   | 0.479    | 0.394   | -0.084      | 0.524                    | 0.404                    | 1.270                           |
| 25   | 7.184    | 0.220   | -6.963      | 0.996                    | 0.002                    | 0.004                           |
| 26   | 0.544    | 0.319   | -0.225      | 0.604                    | 0.326                    | 0.904                           |
| 27   | 6.895    | 0.228   | -6.667      | 0.996                    | 0.003                    | 0.005                           |
| 28   | 25.754   | 0.379   | -25.375     | 1.000                    | 0.000                    | 0.000                           |
| 29   | 0.543    | 0.334   | -0.208      | 0.591                    | 0.339                    | 0.959                           |
| 30   | 0.687    | 0.351   | -0.335      | 0.613                    | 0.323                    | 0.892                           |
| 31   | 2.534    | 0.834   | -1.700      | 0.755                    | 0.186                    | 0.429                           |
| 32   | 0.734    | 0.354   | -0.379      | 0.618                    | 0.319                    | 0.876                           |
| 33   | 0.541    | 0.357   | -0.184      | 0.574                    | 0.357                    | 1.037                           |
| 34   | 0.648    | 0.332   | -0.316      | 0.619                    | 0.315                    | 0.860                           |
| 35   | 0.608    | 0.329   | -0.279      | 0.613                    | 0.320                    | 0.879                           |
| 36   | 0.711    | 0.347   | -0.364      | 0.619                    | 0.317                    | 0.869                           |
| 37   | 1.235    | 0.302   | -0.932      | 0.835                    | 0.129                    | 0.278                           |
| 38   | 3.176    | 0.262   | -2.914      | 0.947                    | 0.039                    | 0.076                           |
| 39   | 1.260    | 0.397   | -0.863      | 0.782                    | 0.177                    | 0.401                           |
| 40   | 3.144    | 0.289   | -2.855      | 0.938                    | 0.046                    | 0.090                           |
| 41   | 5.531    | 0.569   | -4.962      | 0.921                    | 0.058                    | 0.115                           |



|    |        |       |         |       |       |       |
|----|--------|-------|---------|-------|-------|-------|
| 42 | 0.541  | 0.355 | -0.186  | 0.575 | 0.355 | 1.030 |
| 43 | 2.012  | 0.294 | -1.718  | 0.868 | 0.103 | 0.214 |
| 44 | 7.763  | 0.242 | -7.521  | 0.999 | 0.001 | 0.001 |
| 45 | 0.680  | 0.343 | -0.337  | 0.617 | 0.318 | 0.871 |
| 46 | 0.628  | 0.618 | -0.010  | 0.400 | 0.539 | 2.190 |
| 47 | 5.023  | 0.245 | -4.778  | 0.972 | 0.020 | 0.039 |
| 48 | 2.328  | 0.298 | -2.030  | 0.874 | 0.098 | 0.204 |
| 49 | 0.673  | 0.381 | -0.292  | 0.591 | 0.345 | 0.984 |
| 50 | 1.220  | 0.639 | -0.582  | 0.625 | 0.311 | 0.845 |
| 51 | 0.683  | 0.324 | -0.359  | 0.631 | 0.304 | 0.815 |
| 52 | 6.180  | 0.264 | -5.916  | 0.995 | 0.003 | 0.005 |
| 53 | 0.606  | 0.342 | -0.264  | 0.603 | 0.330 | 0.921 |
| 54 | 0.680  | 0.343 | -0.337  | 0.617 | 0.318 | 0.871 |
| 55 | 4.149  | 0.274 | -3.875  | 0.957 | 0.032 | 0.062 |
| 56 | 0.647  | 0.333 | -0.314  | 0.618 | 0.316 | 0.865 |
| 57 | 0.714  | 0.333 | -0.381  | 0.629 | 0.307 | 0.828 |
| 58 | 0.647  | 0.333 | -0.314  | 0.618 | 0.316 | 0.865 |
| 59 | 0.648  | 0.332 | -0.316  | 0.619 | 0.315 | 0.860 |
| 60 | 0.662  | 0.324 | -0.338  | 0.628 | 0.307 | 0.827 |
| 61 | 4.017  | 0.267 | -3.750  | 0.789 | 0.169 | 0.380 |
| 62 | 10.227 | 0.234 | -9.993  | 1.000 | 0.000 | 0.000 |
| 63 | 0.644  | 0.353 | -0.292  | 0.604 | 0.331 | 0.924 |
| 64 | 0.517  | 0.615 | 0.098   | 0.362 | 0.577 | 2.553 |
| 65 | 0.440  | 0.407 | -0.033  | 0.496 | 0.431 | 1.418 |
| 66 | 19.401 | 1.142 | -18.259 | 0.998 | 0.000 | 0.000 |
| 67 | 6.486  | 0.234 | -6.252  | 0.994 | 0.004 | 0.008 |
| 68 | 0.673  | 0.381 | -0.292  | 0.591 | 0.345 | 0.984 |
| 69 | 0.491  | 0.408 | -0.083  | 0.523 | 0.407 | 1.285 |
| 70 | 1.412  | 0.333 | -1.079  | 0.825 | 0.139 | 0.302 |
| 71 | 0.647  | 0.335 | -0.313  | 0.617 | 0.317 | 0.869 |
| 72 | 0.599  | 0.667 | 0.068   | 0.372 | 0.568 | 2.455 |
| 73 | 5.278  | 0.247 | -5.031  | 0.987 | 0.008 | 0.016 |
| 74 | 7.869  | 0.258 | -7.611  | 1.000 | 0.000 | 0.000 |
| 75 | 0.717  | 0.321 | -0.396  | 0.638 | 0.297 | 0.792 |
| 76 | 0.673  | 0.381 | -0.292  | 0.591 | 0.345 | 0.984 |
| 77 | 0.566  | 0.615 | 0.049   | 0.381 | 0.558 | 2.357 |
| 78 | 0.673  | 0.381 | -0.292  | 0.591 | 0.345 | 0.984 |
| 79 | 11.983 | 0.252 | -11.731 | 1.000 | 0.000 | 0.000 |
| 80 | 9.667  | 0.587 | -9.080  | 0.988 | 0.007 | 0.013 |
| 81 | 0.647  | 0.333 | -0.314  | 0.618 | 0.316 | 0.865 |
| 82 | 15.713 | 0.306 | -15.407 | 1.000 | 0.000 | 0.000 |
| 83 | 18.284 | 0.300 | -17.984 | 1.000 | 0.000 | 0.000 |
| 84 | 2.028  | 0.302 | -1.725  | 0.864 | 0.106 | 0.222 |
| 85 | 2.040  | 0.361 | -1.679  | 0.886 | 0.087 | 0.177 |
| 86 | 4.066  | 0.364 | -3.702  | 0.732 | 0.225 | 0.542 |
| 87 | 0.638  | 0.328 | -0.309  | 0.620 | 0.314 | 0.854 |
| 88 | 0.687  | 0.351 | -0.335  | 0.613 | 0.323 | 0.892 |

|     |        |       |         |       |       |       |
|-----|--------|-------|---------|-------|-------|-------|
| 89  | 0.541  | 0.355 | -0.186  | 0.575 | 0.355 | 1.030 |
| 90  | 0.650  | 0.316 | -0.334  | 0.631 | 0.302 | 0.810 |
| 91  | 0.651  | 0.315 | -0.336  | 0.633 | 0.301 | 0.806 |
| 92  | 5.084  | 0.242 | -4.842  | 0.974 | 0.019 | 0.036 |
| 93  | 0.650  | 0.316 | -0.334  | 0.631 | 0.302 | 0.810 |
| 94  | 7.164  | 0.236 | -6.928  | 0.998 | 0.001 | 0.002 |
| 95  | 1.337  | 0.604 | -0.733  | 0.655 | 0.285 | 0.744 |
| 96  | 0.644  | 0.354 | -0.290  | 0.602 | 0.332 | 0.930 |
| 97  | 0.491  | 0.408 | -0.083  | 0.523 | 0.407 | 1.285 |
| 98  | 7.713  | 0.206 | -7.507  | 1.000 | 0.000 | 0.000 |
| 99  | 2.210  | 0.277 | -1.933  | 0.883 | 0.091 | 0.186 |
| 100 | 4.761  | 0.255 | -4.506  | 0.970 | 0.022 | 0.042 |
| 101 | 0.657  | 0.715 | 0.059   | 0.372 | 0.569 | 2.466 |
| 102 | 1.949  | 0.348 | -1.601  | 0.838 | 0.129 | 0.277 |
| 103 | 0.578  | 0.354 | -0.224  | 0.588 | 0.344 | 0.983 |
| 104 | 2.031  | 0.302 | -1.728  | 0.865 | 0.106 | 0.222 |
| 105 | 0.734  | 0.354 | -0.379  | 0.618 | 0.319 | 0.876 |
| 106 | 1.821  | 0.608 | -1.213  | 0.692 | 0.253 | 0.632 |
| 107 | 2.010  | 0.803 | -1.207  | 0.416 | 0.529 | 2.099 |
| 108 | 0.725  | 0.398 | -0.327  | 0.590 | 0.347 | 0.993 |
| 109 | 3.392  | 0.256 | -3.136  | 0.952 | 0.035 | 0.068 |
| 110 | 0.648  | 0.332 | -0.316  | 0.619 | 0.315 | 0.860 |
| 111 | 4.271  | 0.240 | -4.031  | 0.966 | 0.025 | 0.047 |
| 112 | 1.222  | 0.320 | -0.901  | 0.822 | 0.140 | 0.306 |
| 113 | 2.205  | 0.343 | -1.861  | 0.849 | 0.120 | 0.255 |
| 114 | 0.541  | 0.355 | -0.186  | 0.575 | 0.355 | 1.030 |
| 115 | 0.687  | 0.353 | -0.333  | 0.611 | 0.324 | 0.898 |
| 116 | 17.426 | 0.390 | -17.036 | 1.000 | 0.000 | 0.000 |
| 117 | 2.057  | 0.280 | -1.777  | 0.878 | 0.095 | 0.196 |
| 118 | 5.641  | 0.216 | -5.425  | 0.992 | 0.005 | 0.010 |
| 119 | 0.693  | 0.320 | -0.373  | 0.636 | 0.299 | 0.798 |
| 120 | 0.680  | 0.343 | -0.337  | 0.617 | 0.318 | 0.871 |
| 121 | 0.984  | 0.388 | -0.596  | 0.761 | 0.194 | 0.450 |
| 122 | 1.260  | 0.920 | -0.340  | 0.486 | 0.438 | 1.457 |
| 123 | 0.597  | 0.607 | 0.010   | 0.395 | 0.544 | 2.228 |
| 124 | 0.665  | 0.701 | 0.036   | 0.378 | 0.562 | 2.403 |
| 125 | 4.066  | 0.364 | -3.702  | 0.732 | 0.225 | 0.542 |
| 126 | 1.147  | 0.855 | -0.292  | 0.547 | 0.385 | 1.169 |
| 127 | 1.242  | 2.643 | 1.401   | 0.165 | 0.742 | 5.392 |
| 128 | 2.239  | 0.293 | -1.945  | 0.874 | 0.098 | 0.204 |
| 129 | 4.017  | 0.267 | -3.750  | 0.789 | 0.169 | 0.380 |
| 130 | 0.967  | 0.783 | -0.183  | 0.361 | 0.581 | 2.589 |
| 131 | 0.580  | 0.336 | -0.244  | 0.601 | 0.331 | 0.924 |
| 132 | 0.544  | 0.313 | -0.232  | 0.608 | 0.321 | 0.884 |
| 133 | 0.711  | 0.347 | -0.364  | 0.619 | 0.317 | 0.869 |
| 134 | 2.192  | 0.296 | -1.896  | 0.872 | 0.100 | 0.208 |
| 135 | 0.651  | 0.315 | -0.336  | 0.633 | 0.301 | 0.806 |

|     |        |       |         |       |       |       |
|-----|--------|-------|---------|-------|-------|-------|
| 136 | 4.385  | 0.271 | -4.115  | 0.961 | 0.029 | 0.056 |
| 137 | 7.934  | 0.214 | -7.720  | 0.999 | 0.000 | 0.001 |
| 138 | 0.711  | 0.347 | -0.364  | 0.619 | 0.317 | 0.869 |
| 139 | 4.066  | 0.364 | -3.702  | 0.732 | 0.225 | 0.542 |
| 140 | 5.169  | 0.237 | -4.932  | 0.974 | 0.019 | 0.035 |
| 141 | 1.217  | 0.338 | -0.879  | 0.811 | 0.151 | 0.331 |
| 142 | 0.693  | 0.320 | -0.373  | 0.636 | 0.299 | 0.798 |
| 143 | 5.540  | 0.257 | -5.283  | 0.974 | 0.019 | 0.036 |
| 144 | 4.066  | 0.364 | -3.702  | 0.732 | 0.225 | 0.542 |
| 145 | 6.420  | 0.226 | -6.194  | 0.994 | 0.004 | 0.007 |
| 146 | 2.790  | 0.279 | -2.511  | 0.936 | 0.047 | 0.093 |
| 147 | 0.680  | 0.343 | -0.337  | 0.617 | 0.318 | 0.871 |
| 148 | 0.606  | 0.342 | -0.264  | 0.603 | 0.330 | 0.921 |
| 149 | 0.563  | 0.667 | 0.104   | 0.359 | 0.580 | 2.586 |
| 150 | 4.017  | 0.267 | -3.750  | 0.789 | 0.169 | 0.380 |
| 151 | 5.309  | 0.263 | -5.046  | 0.972 | 0.021 | 0.039 |
| 152 | 0.644  | 0.353 | -0.292  | 0.604 | 0.331 | 0.924 |
| 153 | 5.154  | 0.287 | -4.868  | 0.982 | 0.012 | 0.022 |
| 154 | 0.717  | 0.321 | -0.396  | 0.638 | 0.297 | 0.791 |
| 155 | 0.647  | 0.333 | -0.314  | 0.618 | 0.316 | 0.865 |
| 156 | 1.758  | 0.366 | -1.392  | 0.873 | 0.097 | 0.200 |
| 157 | 0.696  | 0.309 | -0.386  | 0.645 | 0.290 | 0.765 |
| 158 | 5.057  | 0.237 | -4.820  | 0.987 | 0.009 | 0.016 |
| 159 | 1.574  | 0.318 | -1.256  | 0.840 | 0.126 | 0.271 |
| 160 | 7.327  | 0.250 | -7.078  | 0.999 | 0.000 | 0.001 |
| 161 | 5.112  | 0.239 | -4.873  | 0.974 | 0.019 | 0.037 |
| 162 | 1.982  | 0.312 | -1.670  | 0.858 | 0.112 | 0.236 |
| 163 | 4.562  | 0.233 | -4.329  | 0.971 | 0.021 | 0.040 |
| 164 | 1.973  | 0.281 | -1.692  | 0.875 | 0.097 | 0.202 |
| 165 | 7.428  | 0.585 | -6.842  | 0.978 | 0.013 | 0.025 |
| 166 | 6.545  | 0.570 | -5.976  | 0.974 | 0.016 | 0.030 |
| 167 | 6.343  | 0.253 | -6.090  | 0.998 | 0.001 | 0.001 |
| 168 | 10.065 | 0.250 | -9.815  | 1.000 | 0.000 | 0.000 |
| 169 | 1.498  | 0.314 | -1.184  | 0.840 | 0.126 | 0.270 |
| 170 | 15.643 | 0.302 | -15.342 | 1.000 | 0.000 | 0.000 |
| 171 | 4.066  | 0.364 | -3.702  | 0.732 | 0.225 | 0.542 |
| 172 | 1.668  | 0.786 | -0.881  | 0.696 | 0.239 | 0.587 |
| 173 | 1.270  | 2.911 | 1.641   | 0.152 | 0.756 | 5.805 |
| 174 | 9.017  | 0.237 | -8.781  | 0.998 | 0.001 | 0.002 |
| 175 | 7.870  | 0.211 | -7.659  | 0.999 | 0.000 | 0.001 |
| 176 | 9.446  | 0.234 | -9.212  | 1.000 | 0.000 | 0.000 |
| 177 | 5.040  | 0.240 | -4.800  | 0.973 | 0.020 | 0.037 |
| 178 | 0.717  | 0.318 | -0.399  | 0.640 | 0.295 | 0.784 |
| 179 | 0.644  | 0.353 | -0.292  | 0.604 | 0.331 | 0.924 |
| 180 | 0.648  | 0.332 | -0.316  | 0.619 | 0.315 | 0.860 |
| 181 | 2.301  | 0.294 | -2.007  | 0.875 | 0.098 | 0.202 |
| 182 | 1.243  | 0.317 | -0.926  | 0.825 | 0.138 | 0.299 |

|     |       |       |        |       |       |        |
|-----|-------|-------|--------|-------|-------|--------|
| 183 | 6.514 | 0.214 | -6.300 | 0.995 | 0.003 | 0.006  |
| 184 | 0.530 | 3.266 | 2.736  | 0.041 | 0.933 | 26.168 |
| 185 | 0.578 | 0.361 | -0.217 | 0.583 | 0.349 | 1.004  |
| 186 | 1.423 | 0.293 | -1.131 | 0.850 | 0.117 | 0.248  |
| 187 | 1.830 | 0.354 | -1.477 | 0.881 | 0.090 | 0.185  |
| 188 | 5.199 | 0.270 | -4.929 | 0.991 | 0.005 | 0.010  |
| 189 | 2.067 | 0.302 | -1.765 | 0.866 | 0.105 | 0.220  |
| 190 | 0.725 | 0.398 | -0.327 | 0.590 | 0.347 | 0.993  |
| 191 | 1.920 | 0.299 | -1.621 | 0.863 | 0.107 | 0.224  |
| 192 | 0.597 | 0.695 | 0.098  | 0.362 | 0.578 | 2.564  |
| 193 | 6.897 | 0.547 | -6.350 | 0.978 | 0.014 | 0.027  |
| 194 | 0.649 | 0.356 | -0.293 | 0.602 | 0.332 | 0.931  |
| 195 | 5.051 | 0.264 | -4.787 | 0.969 | 0.022 | 0.043  |
| 196 | 5.285 | 0.299 | -4.986 | 0.964 | 0.026 | 0.049  |
| 197 | 2.363 | 0.298 | -2.065 | 0.875 | 0.097 | 0.202  |
| 198 | 0.614 | 0.316 | -0.298 | 0.624 | 0.308 | 0.834  |
| 199 | 0.649 | 0.356 | -0.293 | 0.602 | 0.332 | 0.931  |
| 200 | 0.724 | 0.320 | -0.404 | 0.640 | 0.296 | 0.786  |
| 201 | 5.154 | 0.251 | -4.903 | 0.972 | 0.021 | 0.040  |
| 202 | 1.628 | 0.295 | -1.333 | 0.856 | 0.113 | 0.238  |
| 203 | 2.047 | 0.282 | -1.766 | 0.876 | 0.096 | 0.199  |
| 204 | 1.435 | 0.304 | -1.130 | 0.843 | 0.123 | 0.263  |
| 205 | 5.102 | 0.238 | -4.864 | 0.975 | 0.018 | 0.034  |
| 206 | 5.664 | 0.549 | -5.115 | 0.966 | 0.022 | 0.042  |

<sup>a</sup>Mean posterior synonymous substitution rate at a site.

<sup>b</sup>Mean posterior non-synonymous substitution rate at a site.

<sup>c</sup>Mean posterior beta-alpha.

<sup>d</sup>Posterior probability of negative selection at a site.

<sup>e</sup>Posterior probability of positive selection at a site.

<sup>f</sup>Empirical Bayes Factor for positive selection at a site.

**TABLE S8** Statistically supported migration rates of Cucurbit aphid-borne yellows virus estimated from the ORF2 among sites 1, 2, 3 and 4.

| From (host <sup>a</sup> ) | To (host <sup>a</sup> ) | Mean migration rate <sup>b</sup> | Indicator <sup>c</sup> | Bayes Factor <sup>d</sup> |
|---------------------------|-------------------------|----------------------------------|------------------------|---------------------------|
| Site2 (EE)                | Site3 (EE)              | 1.07                             | 0.97                   | 158.17                    |
| Site1 (M)                 | Site3 (M)               | 0.98                             | 0.91                   | 41.95                     |
| Site2 (M)                 | Site3 (M)               | 1.83                             | 0.87                   | 28.89                     |
| Site2 (EE)                | Site4 (EE)              | 0.99                             | 0.87                   | 28.04                     |
| Site1 (EE)                | Site4 (EE)              | 1.07                             | 0.73                   | 11.28                     |
| Site1 (M)                 | Site4 (M)               | 1.22                             | 0.57                   | 5.4                       |
| Site3 (M)                 | Site4 (M)               | 0.99                             | 0.56                   | 5.31                      |

<sup>a</sup>EE: *Ecballium elaterium*; M: Melon.

<sup>b</sup>Unit: migration event per lineage per year.

<sup>c</sup>Posterior probability of observing a non-zero migration rate in the sampled trees.

<sup>d</sup>Only statistically supported migrations with indicator values > 0,50 and BF > 3 are shown.

**TABLE S9** Statistically supported migration rates of Tomato leaf curl New Delhi virus estimated from the AV2 gene among sites 2, 3, and 4.

| <b>From (host)</b> | <b>To (host)</b> | <b>Mean migration rate</b> | <b>Indicator</b> | <b>Bayes Factor</b> |
|--------------------|------------------|----------------------------|------------------|---------------------|
| Site2 (EE)         | Site4 (EE)       | 1.01                       | 0,91             | 30,24               |
| Site4 (M)          | Site4 (EE)       | 1.34                       | 0,83             | 15,17               |
| Site3 (EE)         | Site4 (EE)       | 1.01                       | 0,53             | 3,61                |
| Site3 (M)          | Site4 (EE)       | 1.02                       | 0,51             | 3,26                |
| Site2 (M)          | Site4 (EE)       | 0.97                       | 0,51             | 3,23                |

<sup>a</sup>EE: *Ecballium elaterium*, M: Melon.

<sup>b</sup>Unit: migration event per lineage per year.

<sup>c</sup>Posterior probability of observing a non-zero migration rate in the sampled trees.

<sup>d</sup>Only statistically supported migrations with indicator values > 0,50 and BF > 3 are shown.

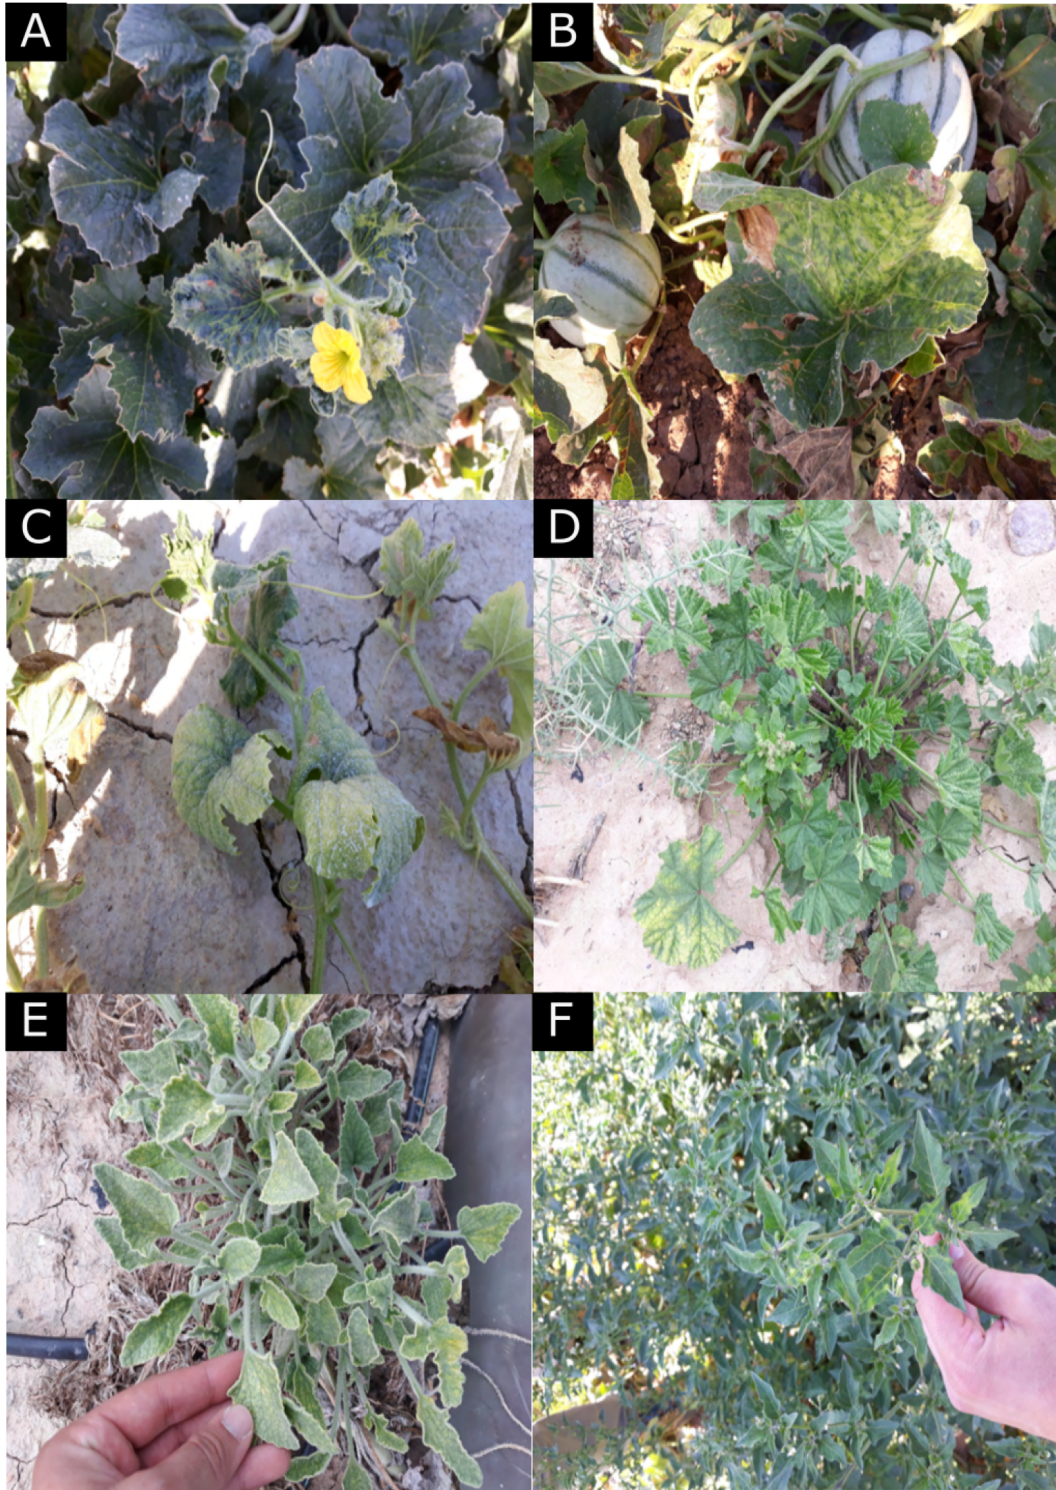

**FIG S1** Symptoms in melon and associated weed plants collected during surveys. In melon, mosaics in the upper leaves (**A**) and yellowing on the basal leaves of older plants (**B**) were more frequent, whereas leaf-curling, leaf area reduction and internode shortening, and severe stunting (**C**) were less frequent. Weeds were almost asymptomatic, with few exceptions where we noticed general chlorosis in *Malva sylvestris* (**D**) and *Ecballium elaterium* (**E**) and mosaics in the upper leaves of *Solanum nigrum* (**F**).

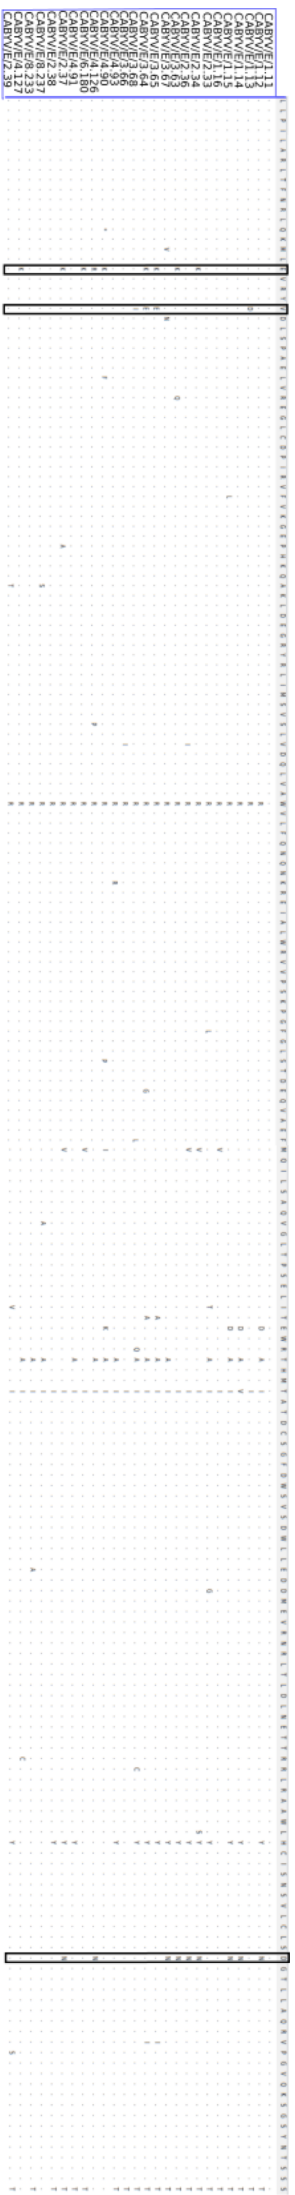

**FIG S2** Alignment of CABVY amino acid sequences from *E. elaterium* isolates showing the codons under positive selection in ORF2. A rectangular box represents the amino acid putatively under positive selection.



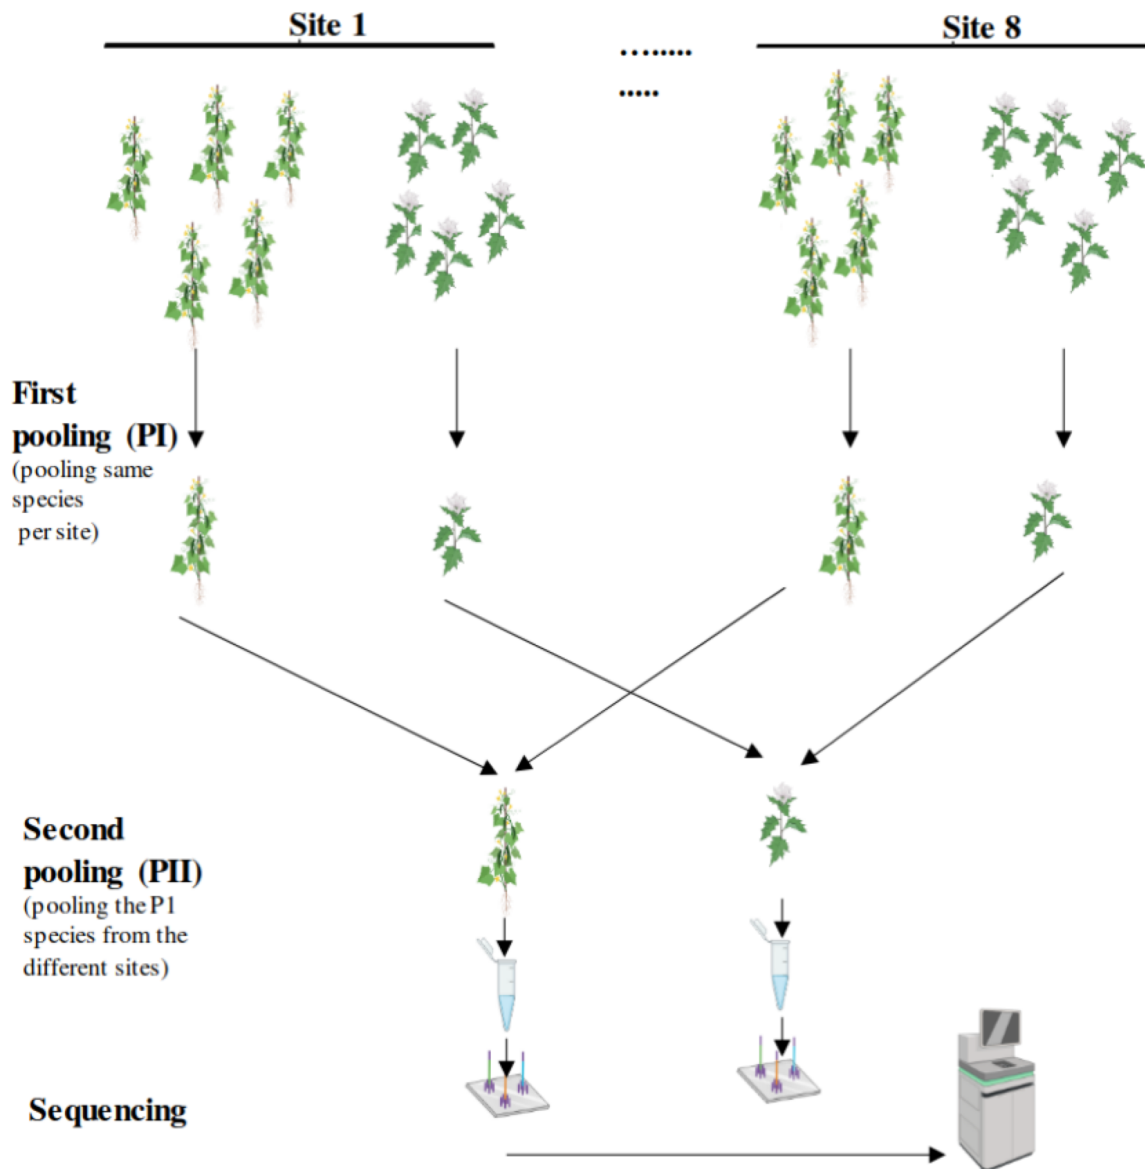

**FIG S3** Schematic representation showing the pooling and sequencing strategy. Samples were pooled in a first stage by species and site. A second pool was constructed by pooling the first pools by species.
